# Supplementary material for: In situ nuclear magnetic resonance response of permafrost and active layer soil in boreal and tundra ecosystems
Source: Copernicus journal article supplement (doi:10.5194/tc-11-2943-2017), 2017-12-14
Supplement: Supplementary file [file tc-11-2943-2017-supplement-title-page.pdf › tc-11-2943-2017-supplement-title-page.pdf]

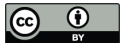

## *Supplement of*

# **In situ nuclear magnetic resonance response of permafrost and active layer soil in boreal and tundra ecosystems**

**M. Andy Kass et al.**

*Correspondence to:* M. Andy Kass ([andy.kass@geo.au.dk](mailto:andy.kass@geo.au.dk))

- [tc-11-2943-2017-supplement-title-page.pdf](#)
- [S01\\_combined.png](#)
- [S01a.pdf](#)
- [S01b.pdf](#)
- [S01c.pdf](#)
- [S02\\_combined.png](#)
- [S02a.pdf](#)
- [S02b.pdf](#)
- [S03c.pdf](#)
- [supplementary\\_material.pdf](#)
- [supplementary\\_material.tex](#)

The copyright of individual parts of the supplement might differ from the CC BY 3.0 License.
