# Supplementary figures and images for: In situ nuclear magnetic resonance response of permafrost and active layer soil in boreal and tundra ecosystems
Source: Copernicus journal article supplement (doi:10.5194/tc-11-2943-2017), 2017-12-14

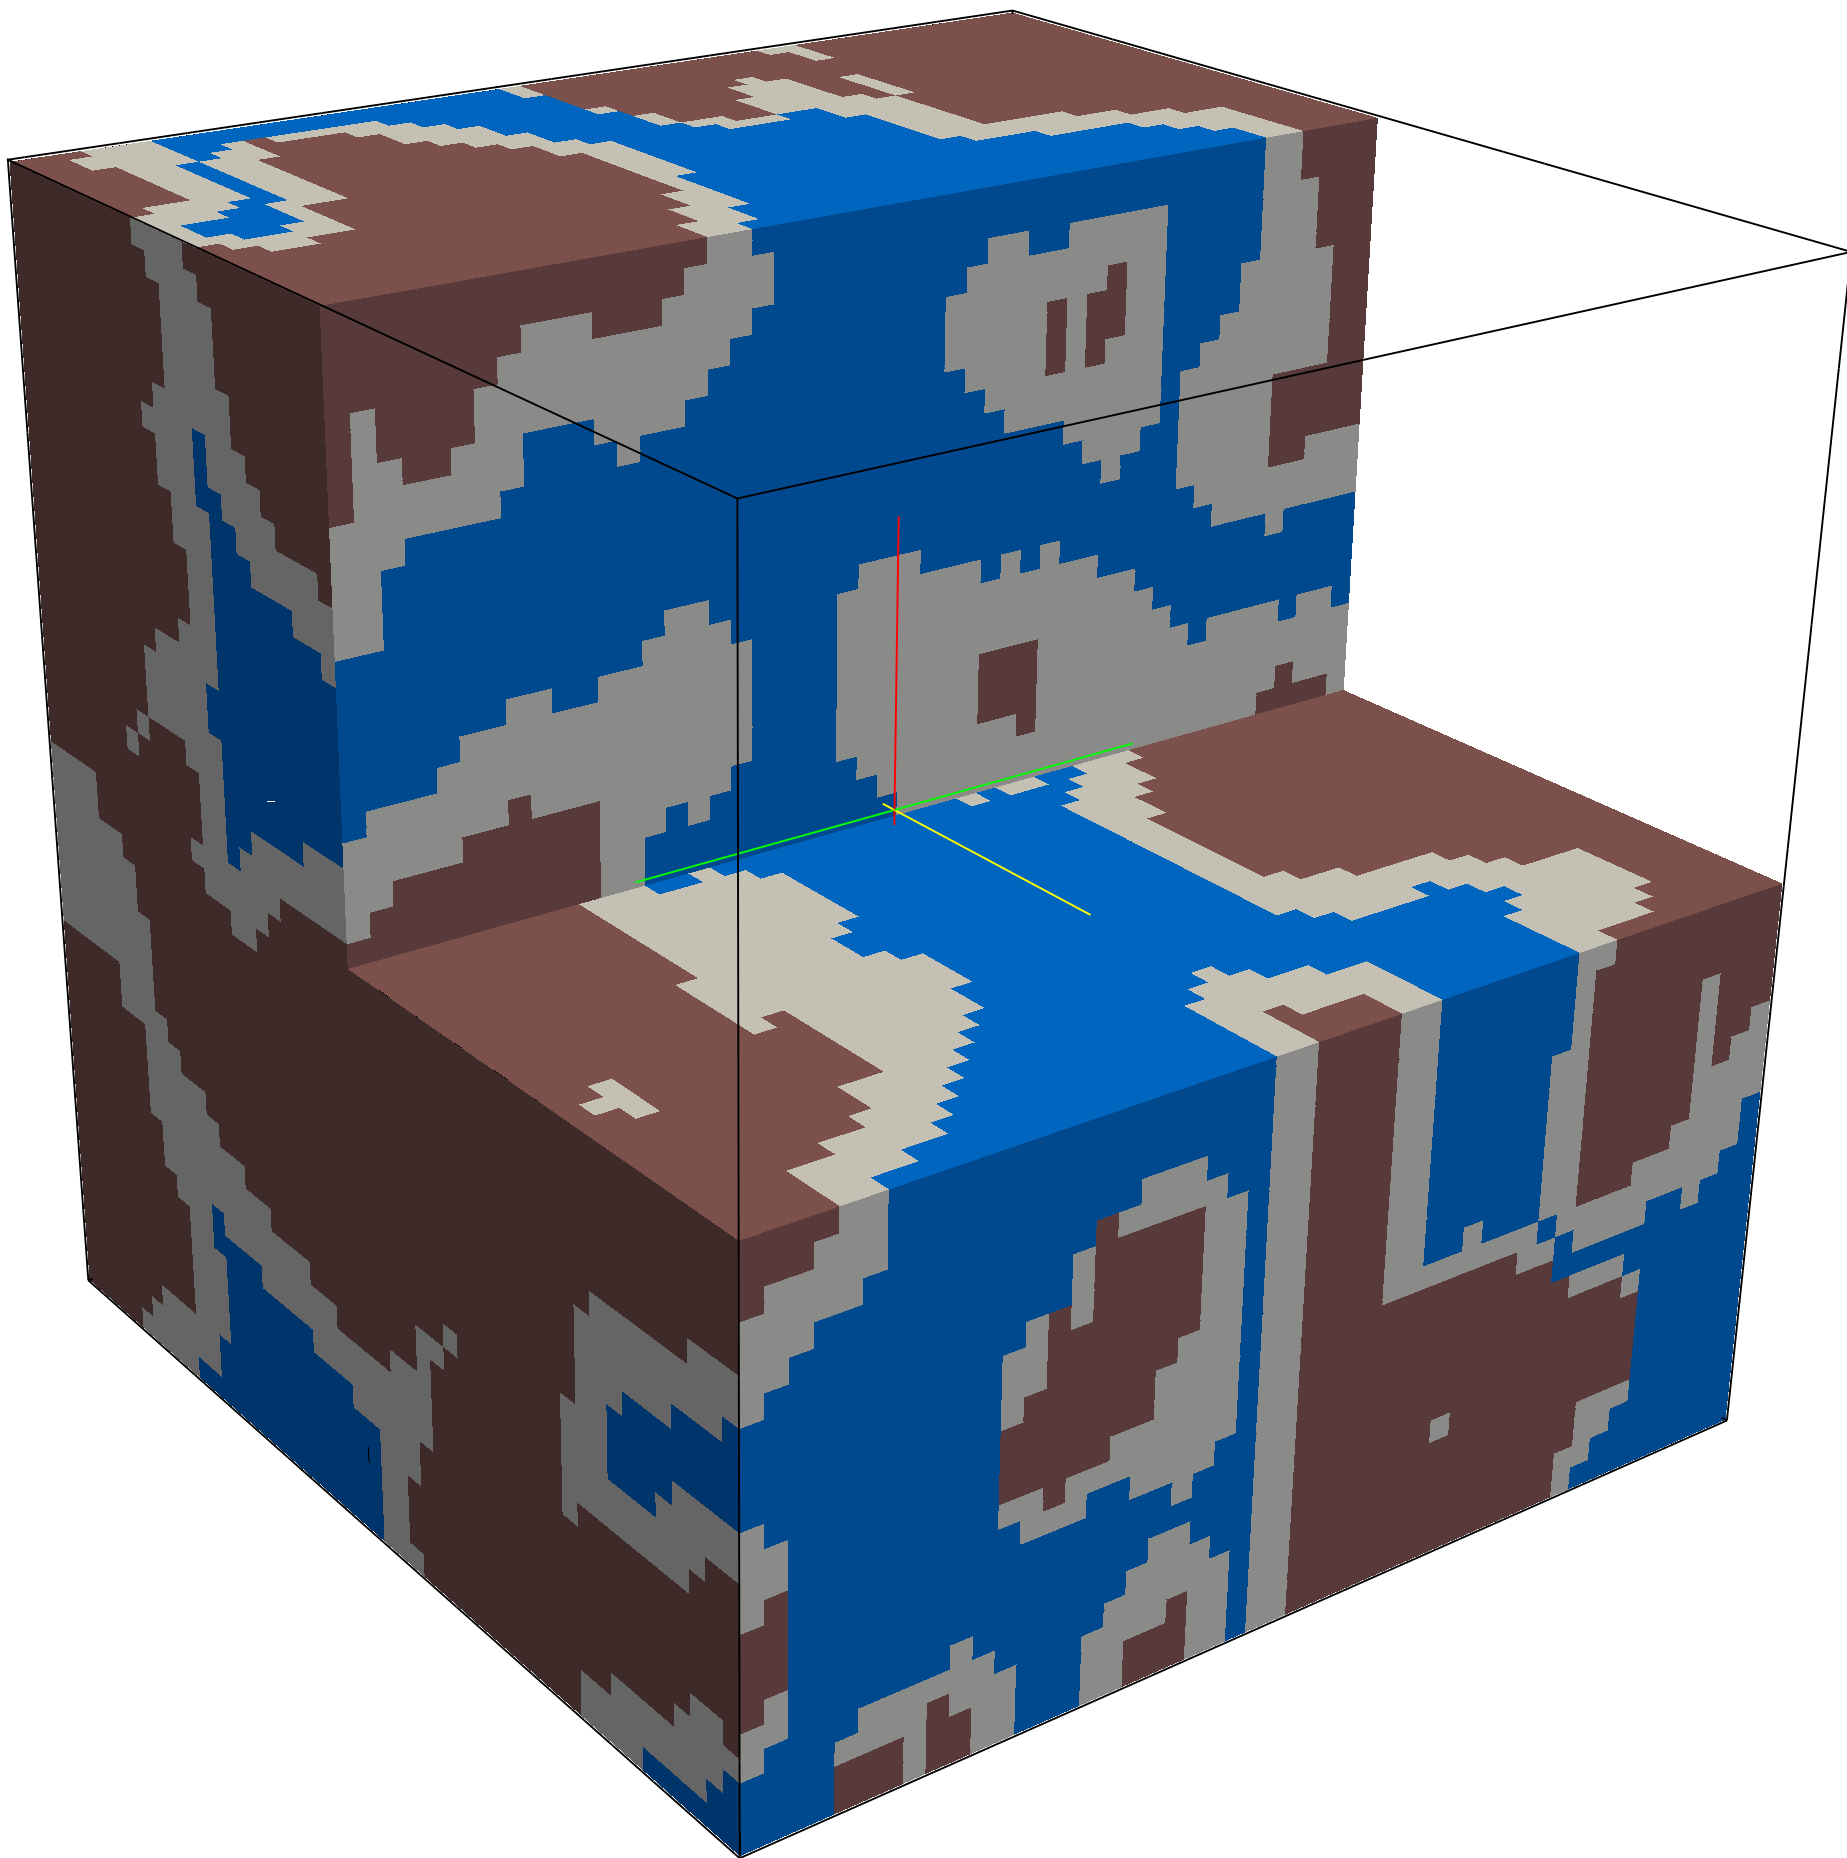

Supplement: Supplementary file 1 [file S01a.pdf › S01a.pdf]

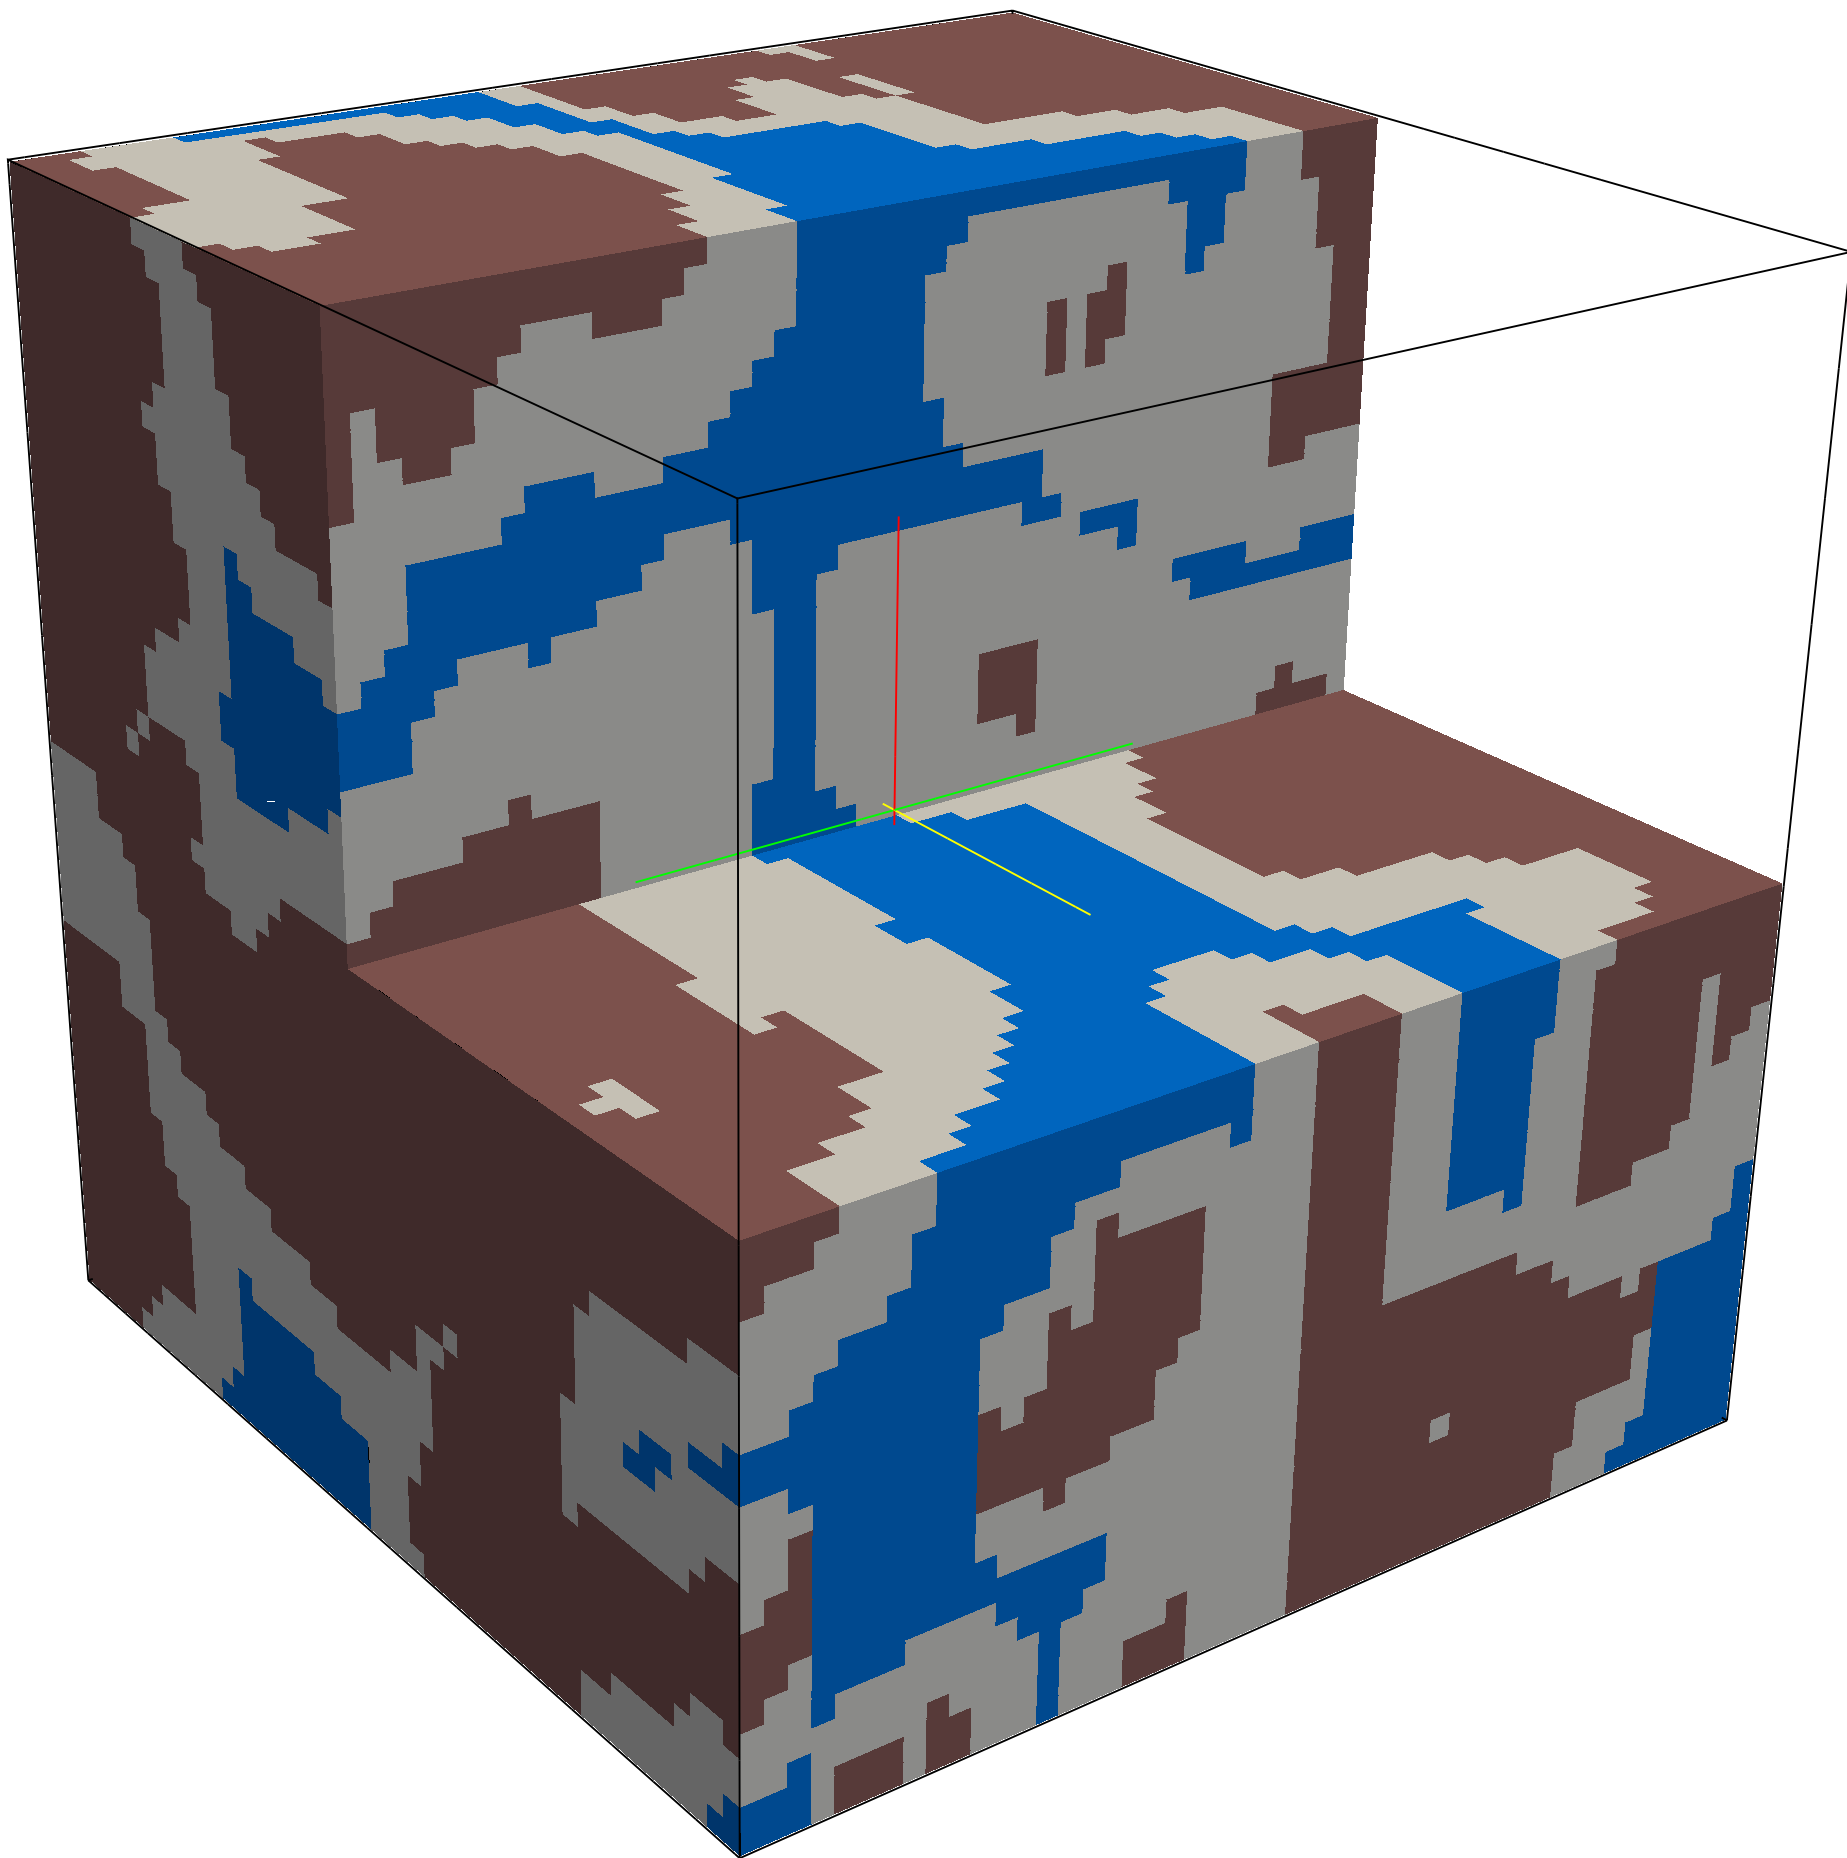

Supplement: Supplementary file 2 [file S01b.pdf › S01b.pdf]

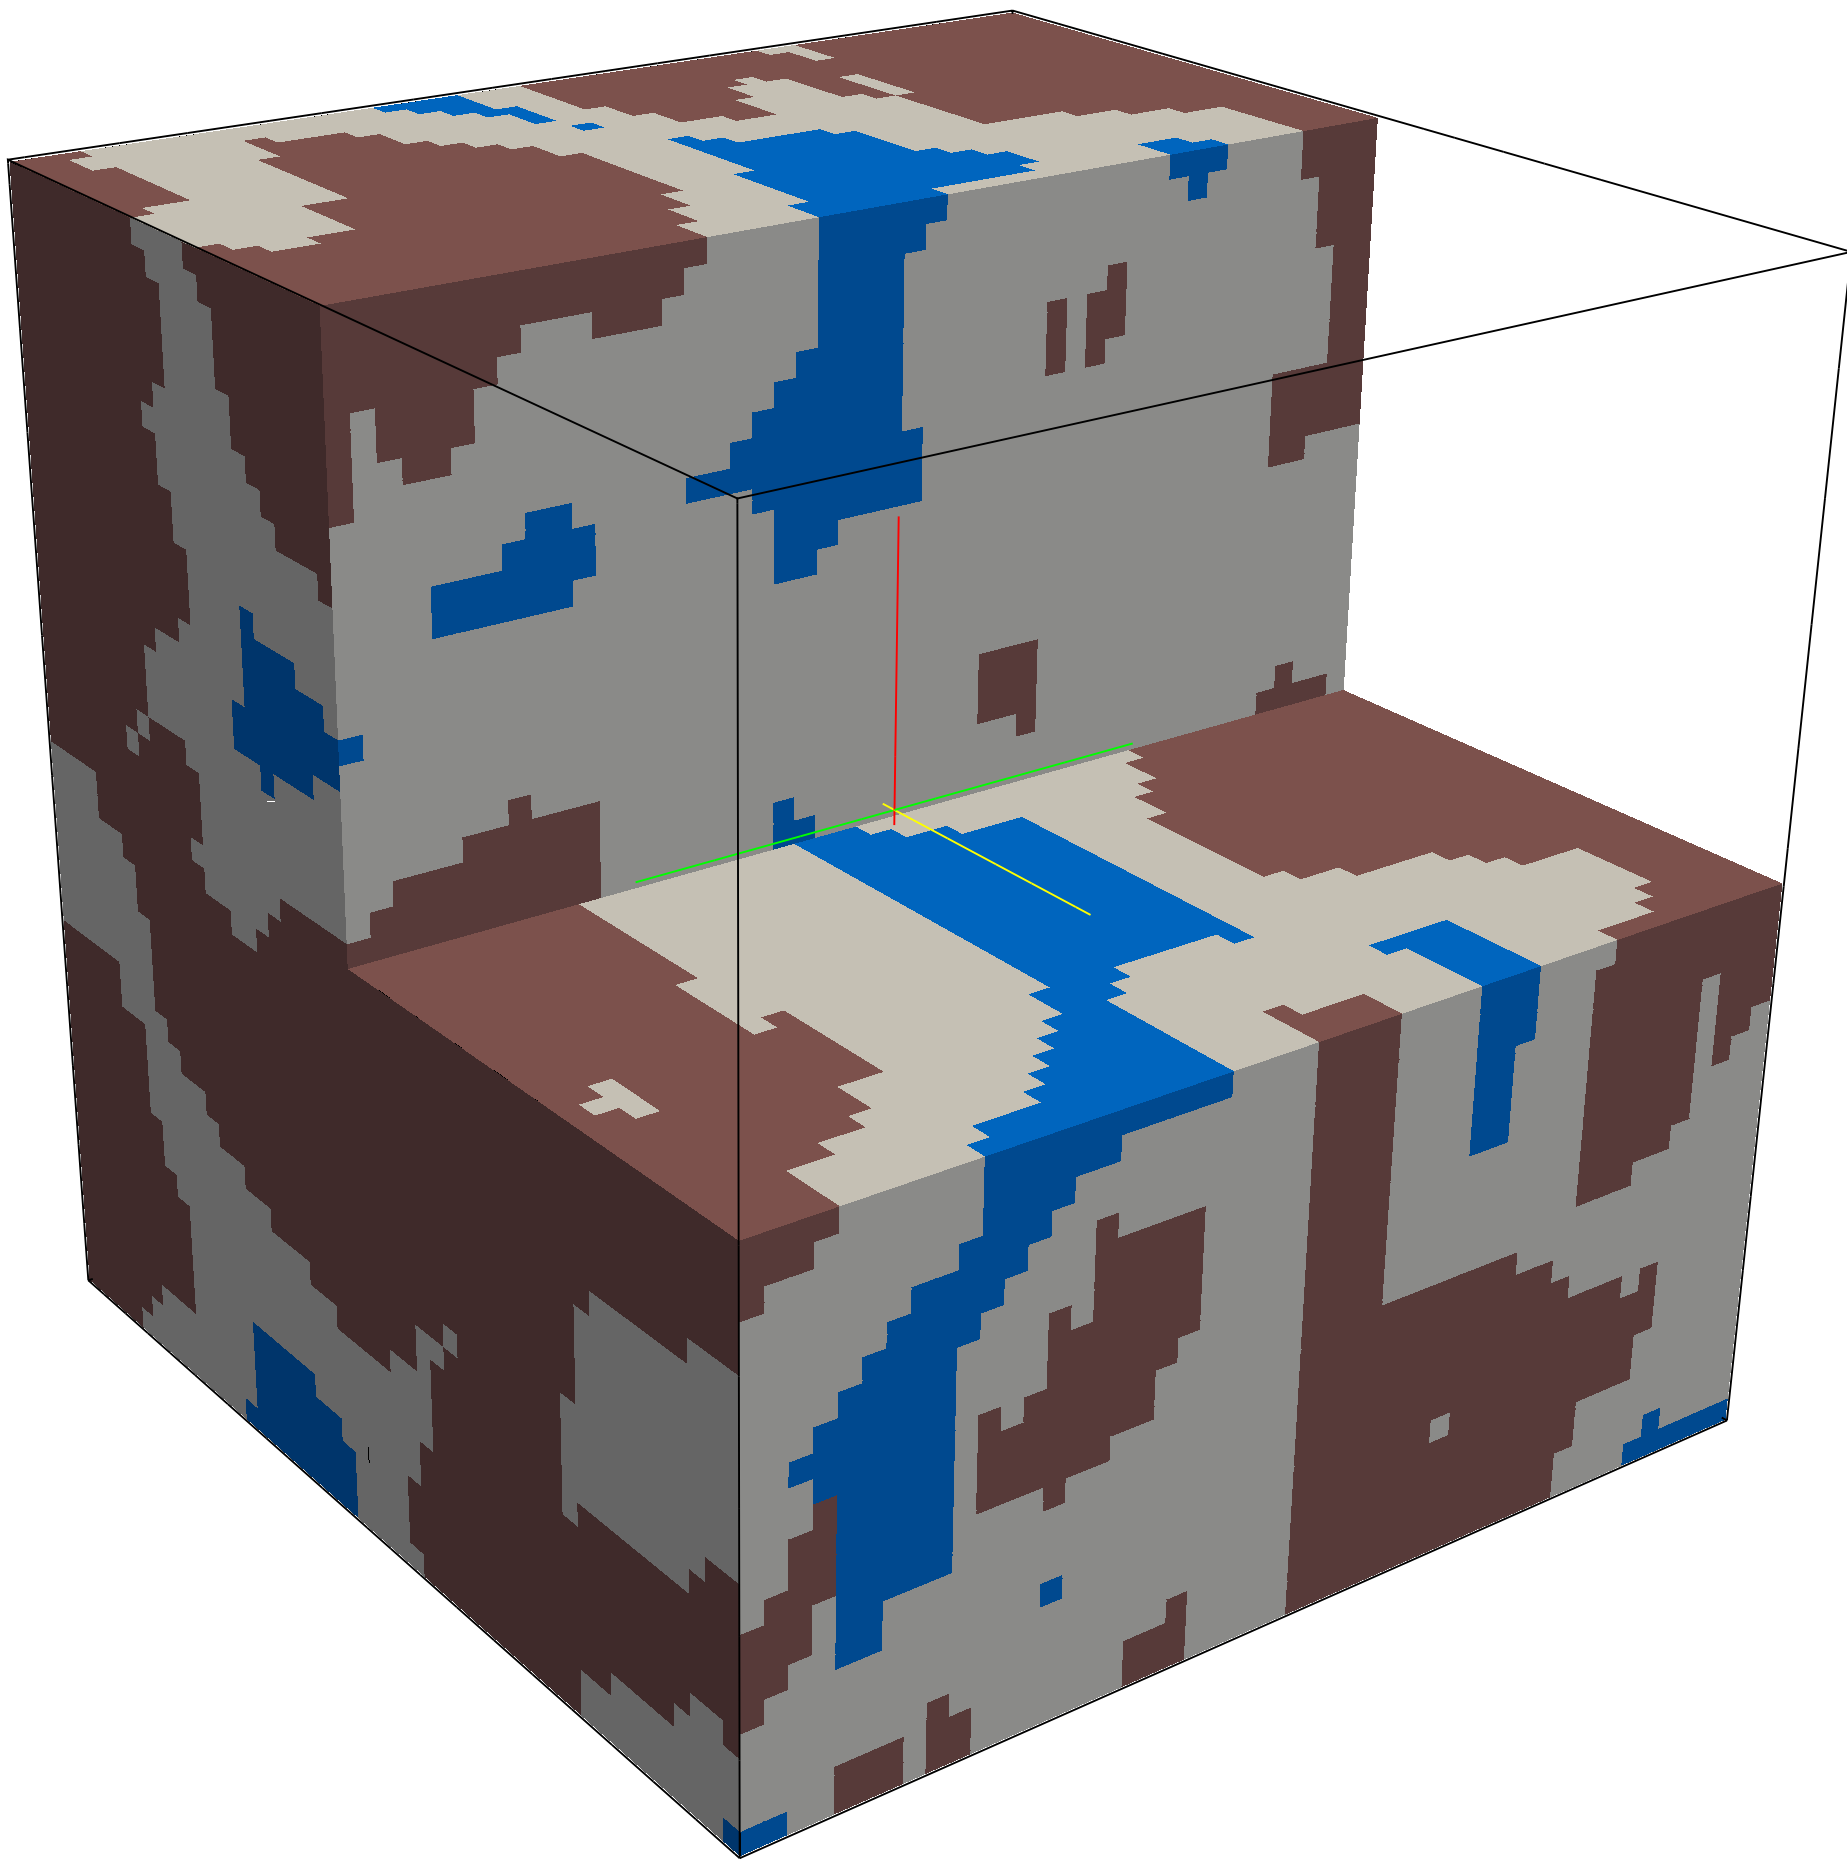

Supplement: Supplementary file 3 [file S01c.pdf › S01c.pdf]

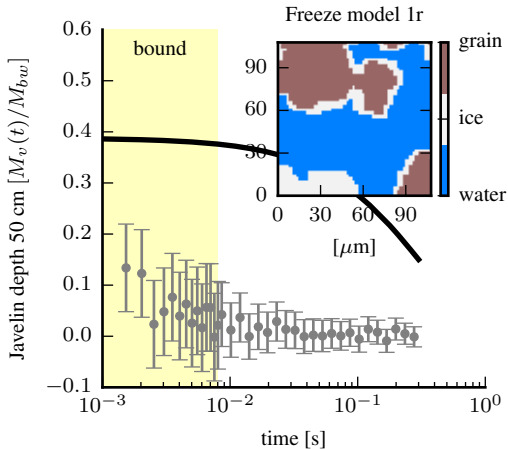

Supplement: Supplementary file 4 [file S02a.pdf › S02a.pdf]

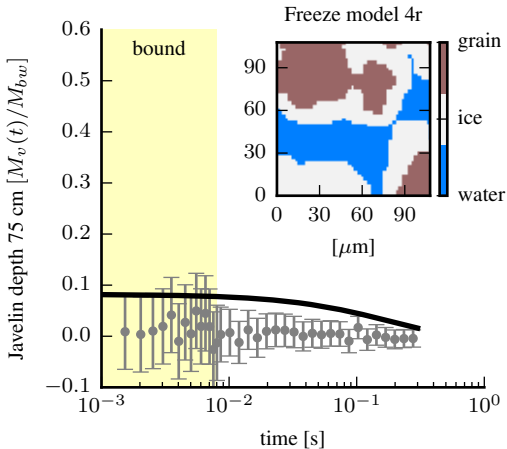

Supplement: Supplementary file 5 [file S02b.pdf › S02b.pdf]

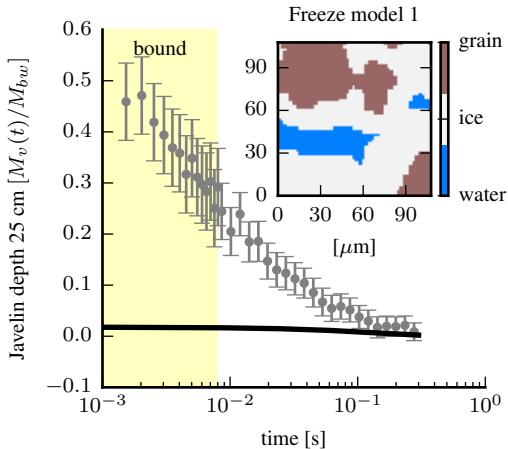

Supplement: Supplementary file 6 [file S03c.pdf › S03c.pdf]
